# Supplementary material
Source: PubMed Central journal article supplement (PMC5313380)

Supplemental Figure 1. Sample Size Flowchart

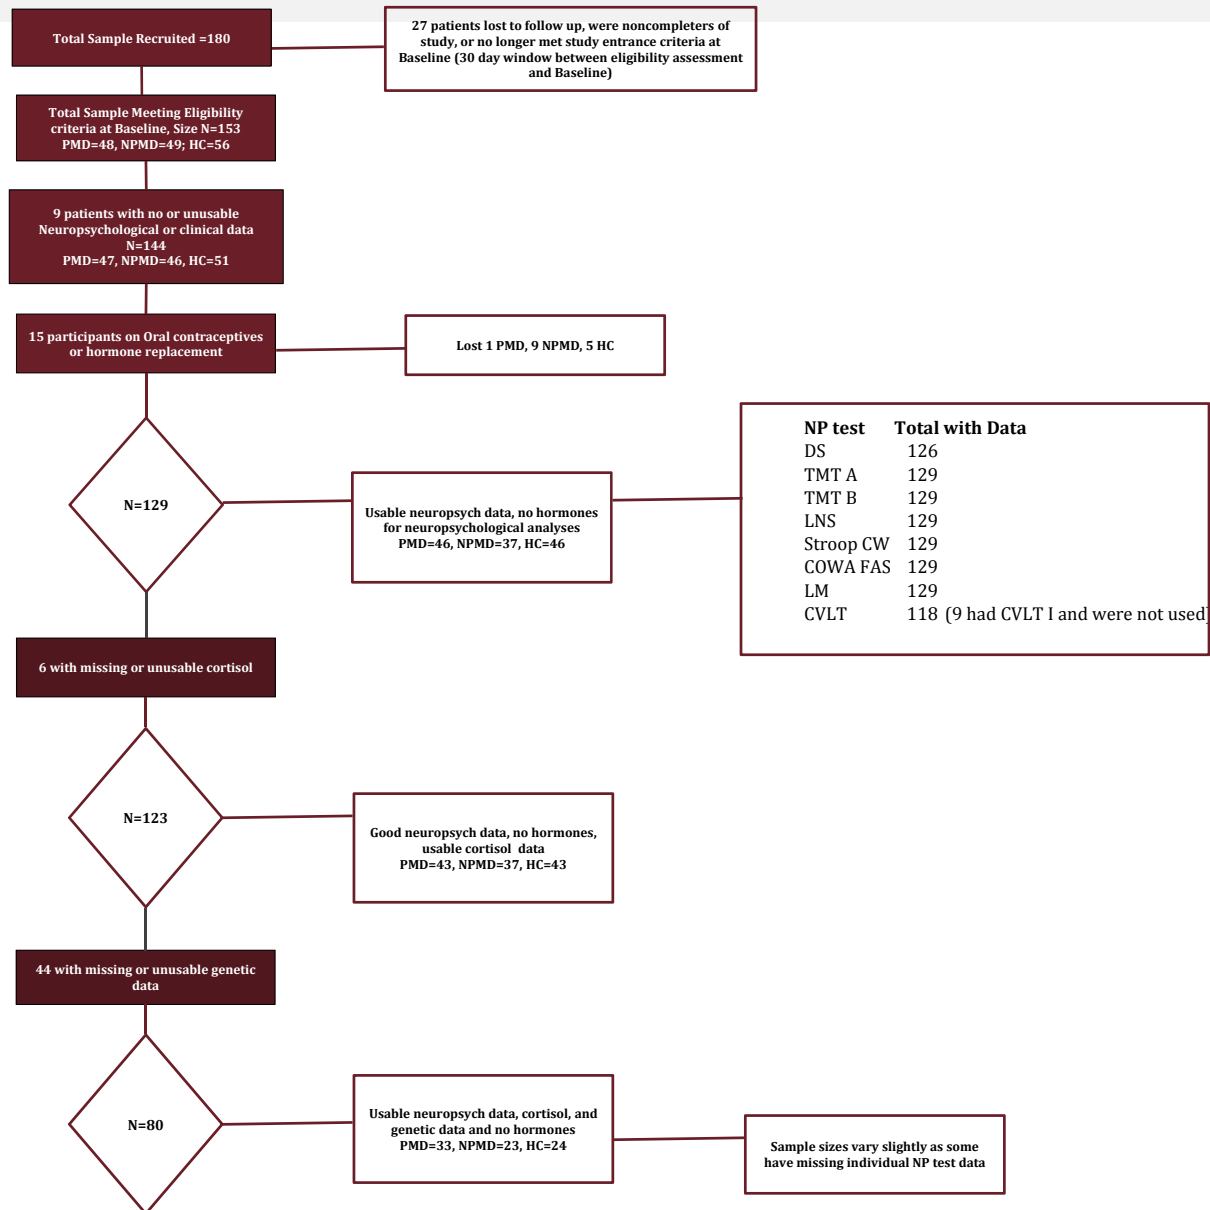

Supplement: NIHMS793896-supplement-1.pdf [file NIHMS793896-supplement-1.pdf]
